# Supplementary material
Source: PubMed Central journal article supplement (PMC6024550)
Supplement: SC-007-C6SC01000H-s001.pdf [file SC-007-C6SC01000H-s001.pdf]

## Supplemental Information

### Correlating Drug-Target Kinetics and *In vivo* Pharmacodynamics: Long Residence Time Inhibitors of the FabI Enoyl-ACP Reductase

F. Daryaei,<sup>a#</sup> A. Chang,<sup>a#</sup> J. Schiebel,<sup>c,e,f</sup> Y. Lu,<sup>a</sup> Z. Zhang,<sup>a</sup> K. Kapilashrami,<sup>a</sup> S. G. Walker,<sup>b</sup> C. Kisker,<sup>c</sup> C. A. Sotriffer,<sup>c</sup> S. L. Fisher<sup>d\*</sup> and Peter J. Tonge<sup>a\*</sup>

<sup>a</sup>*Institute for Chemical Biology & Drug Discovery, Department of Chemistry, Stony Brook University, Stony Brook, NY 11794-3400, USA.*

<sup>b</sup>*Institute for Chemical Biology & Drug Discovery, Department of Oral Biology and Pathology Stony Brook University, Stony Brook, NY 11794-3400, USA.*

<sup>c</sup>*Rudolf Virchow Center for Experimental Biomedicine, Institute for Structural Biology, University of Würzburg, D-97080 Würzburg, Germany.*

<sup>d</sup>*The Broad Institute, Cambridge MA 02142, USA.*

<sup>e</sup>*Institute of Pharmacy and Food Chemistry, University of Würzburg, D-97074 Würzburg, Germany.*

<sup>f</sup>*Present address: Institute of Pharmaceutical Chemistry, Philipps-Universität Marburg, Marbacher Weg 6, D-35032 Marburg, Germany.*

#These authors contributed equally to this work.

\*Correspondence to: [stewfisher@slfisherconsulting.com](mailto:stewfisher@slfisherconsulting.com) and [peter.tonge@stonybrook.edu](mailto:peter.tonge@stonybrook.edu)



Assuming that we have steady-state conditions for enzyme and enzyme-substrate complex formation, we have (Equation S4),

$$[ES] = \frac{[E][S]}{K_m} \quad \text{Equation S4}$$

Equation S3 becomes Equation S5:

$$1 = [ES] * \frac{K_m}{[S]} + [ES] + [ESI]$$

$$1 - \left(1 + \frac{K_m}{[S]}\right) * [ES] = [ESI]$$

$$M = \frac{K_m}{[S]}; \beta = 1 + \frac{K_m}{[S]}$$

$$1 - \beta * [ES] = [ESI] \quad \text{Equation S5}$$

Taking derivatives of both sides with the assumption that substrate and inhibitor concentrations, [S] and [I], are not changing over time, we have Equations S6

$$-\beta * \frac{d[ES]}{dt} = \frac{d[ESI]}{dt} \quad \text{Equation S6}$$

According to **Scheme 1**, there is an equilibrium between [ES] and [ESI], so,

$$\frac{d[ESI]}{dt} = k_3 * [ES] * [I] - k_4 * [ESI] \quad \text{Equation S7}$$

Combining Equations S6 and S7, we have

$$-\beta * \frac{d[ES]}{dt} = k_3 * [ES] * [I] - k_4 * [ESI] \quad \text{Equation S8}$$

Replacing [ESI] with the equation containing [ES], Equation S5, and also replacing  $k_3$  with  $\frac{k_4}{K_i}$ , we

have

$$-\beta * \frac{d[ES]}{dt} = k_4 * [ES] * \frac{[I]}{K_i} - k_4 * (1 - \beta * [ES]) \quad \text{Equation S9}$$

Dividing both sides of Equation S9 by  $-\beta$  and also applying some basic algebraic principles, leads to Equation S10:

$$\frac{d[ES]}{dt} = \frac{-k_4}{\beta} * [ES] * \frac{[I]}{K_i} + \frac{k_4}{\beta} - k_4 * [ES]$$

$$\frac{d[ES]}{dt} = \frac{k_4}{\beta} - \left( k_4 + \frac{k_4}{\beta} * \frac{[I]}{K_i} \right) * [ES]$$

$$k = k_4 + \frac{k_4}{\beta} * \frac{[I]}{K_i}$$

$$\frac{d[ES]}{dt} = \frac{k_4}{\beta} - k * [ES] \quad \text{Equation S10}$$

Integrating the differential equation yields

$$[ES] = \frac{k_4}{\beta * k} + \left( [ES]_0 - \frac{k_4}{\beta * k} \right) * e^{-k * t} \quad \text{Equation S11}$$

Equation S11 can then be incorporated into Equation S12 which relates the concentration of every enzyme species that is not ES to the rate of bacterial growth, where  $\lambda$  is the logarithmic growth rate,  $\varepsilon$  is the maximum inhibitor-induced kill rate and  $N$  is the bacterial cell count in CFU/mL, to give Equation S13:

$$\frac{dN}{dt} = (\lambda - \varepsilon[NotES])N \quad \text{Equation S12}$$

$$\frac{dN}{dt} = \left( \lambda - \varepsilon \left( 1 - \frac{k_4}{\beta * k} - \left( [ES]_0 - \frac{k_4}{\beta * k} \right) * e^{-k * t} \right) \right) N \quad \text{Equation S13}$$

Integration of Equation S13 gives Equation S14

$$[N] = [N_0] \exp \left( \left[ \lambda - \varepsilon \left( 1 - \frac{k_4}{\beta * k} \right) \right] t + \varepsilon \frac{\left( [ES]_0 - \frac{k_4}{\beta * k} \right)}{k} (1 - e^{-k * t}) \right) \quad \text{Equation S14}$$

It is important to note that [I] is the concentration of inhibitor at the target (i.e. the intracellular drug concentration). Since we do not have direct knowledge of this value, we introduce a permeability factor  $\rho_m$ , which relates the intracellular drug concentration to the concentration of drug in the media in the *in vitro* PAE experiment or to the free fraction plasma drug concentration in the *in vivo* experiments. As we don't have any experimental value for  $\rho_m$ , we estimate its value after fitting the *in vitro* PAE data to Equation S14 by choosing a random seed value and letting the value float within a large constraint range to get the best estimate of  $\rho_m$  based on the best fit.

$$[I] = [Drug]_{in\ media\ or\ plasma} * \rho_m$$

### Calculation of $TO_{min}$ and $TO_{max}$

To estimate the minimum and maximum target occupancy required for antibacterial activity, a new model, complementary to the original integrated model, has been developed in Mathematica. In this new model equations S10 and S12 are again our key equations.

$$\frac{d[ES]}{dt} = \frac{k_4}{\beta} - k * [ES] \quad \text{Equation S10}$$

$$\frac{dN}{dt} = (\lambda - \varepsilon[NotES])N = (\lambda - \varepsilon(1 - [ES]_t))N \quad \text{Equation S12}$$

However, to estimate the minimum and maximum target occupancy an extra condition is introduced in which all target occupancy levels ( $1 - [ES]_t$ ) with values less than  $TO_{min}$  result in no effect and values higher than  $TO_{max}$  produce the maximum obtainable efficacy (Equation S15). In addition, a linear correlation between occupancy and effect is assumed to exist between  $TO_{min}$  and  $TO_{max}$  (Equation S16).

$$\frac{dN}{dt} = \lambda * N - \varepsilon * (\text{If}[(1 - [ES]_t) < TO_{max}, \text{If}[(1 - [ES]_t) > TO_{min}, 1/(TO_{max} - TO_{min}) * (1 - [ES]_t) - TO_{min}/(TO_{max} - TO_{min}), 0], 1]) * N$$

Equation S15

$$0 < \frac{(1 - [ES]_t) - TO_{min}}{TO_{max} - TO_{min}} < 1$$

Equation S16

Fitting of the experimental PAE data obtained at each drug concentration to Equation S15 yields values of  $TO_{min}$  and  $TO_{max}$ , as well as the value of  $[ES]_t$  at the beginning of PAE phase.

## Pharmacokinetic Data for PT55 and PT119

a)

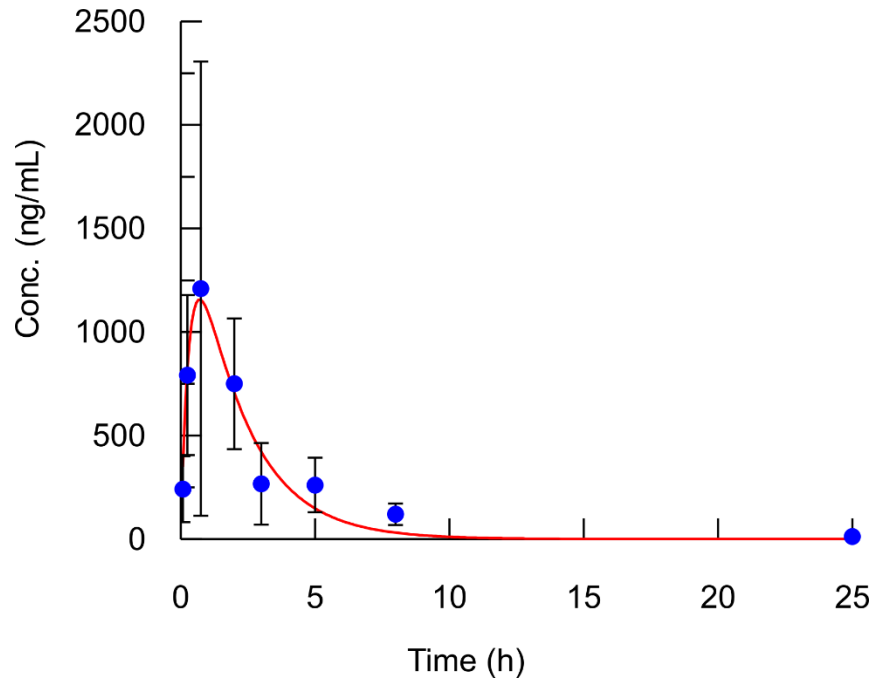

b)

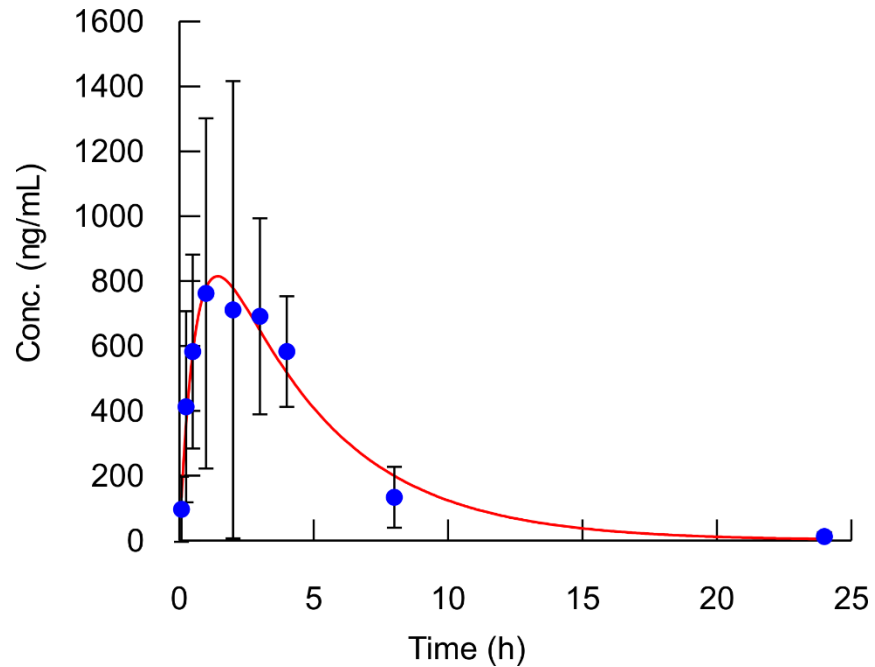

**Figure 1.** Pharmacokinetics (PK) of a) PT55 and b) PT119. Experimental data points represent mean values from triplicate and error bars represent 1 s.d. Solid lines are the result of fitting the experimental values to a one-compartment PK model. The PK parameters are given in Table 3.

## Analytical Data for SKTS1

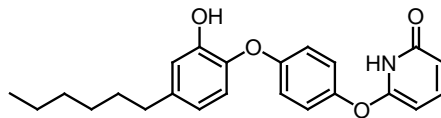

SKTS1

Chemical Formula: C<sub>23</sub>H<sub>25</sub>NO<sub>4</sub>

Exact Mass: 379.17836

|                        |                      |                      |                            |                  |                      |                        |         |
|------------------------|----------------------|----------------------|----------------------------|------------------|----------------------|------------------------|---------|
| Acquisition Time (sec) | 3.9846               | Comment              | 1H                         | Date             | 27 Apr 2016 10:00:32 |                        |         |
| Date Stamp             | 27 Apr 2016 10:00:32 | File Name            | E:\20160427_55\52\data\11r | Frequency (MHz)  | 399.83               |                        |         |
| Nucleus                | 1H                   | Number of Transients | 16                         | Origin           | spect                | Original Points Count  | 32768   |
| Points Count           | 65536                | Pulse Sequence       | zg30                       | Receiver Gain    | 65.76                | SW(cyclical) (Hz)      | 8223.68 |
| Spectrum Offset (Hz)   | 2469.1111            | Spectrum Type        | STANDARD                   | Sweep Width (Hz) | 8223.56              | Solvent                | Acetone |
|                        |                      |                      |                            |                  |                      | Temperature (degree C) | 25.151  |

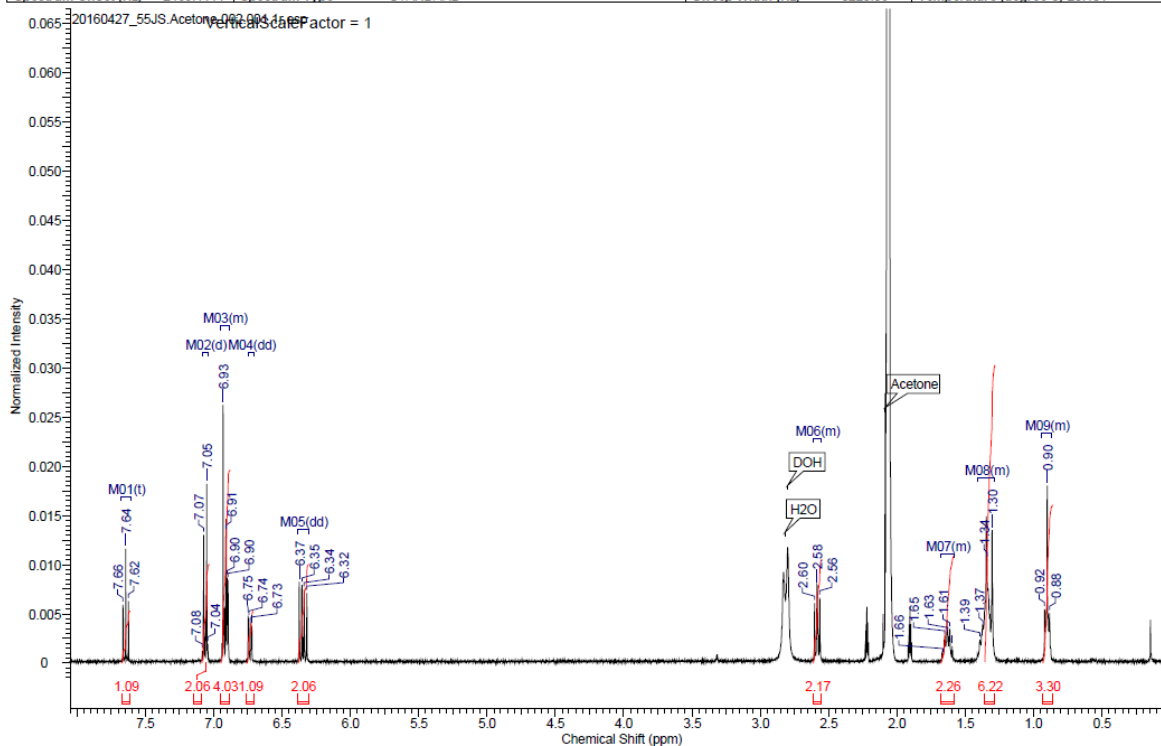

<sup>1</sup>H NMR (400 MHz, Acetone) δ ppm 0.87 - 0.94 (m, 3 H) 1.28 - 1.41 (m, 6 H) 1.58 - 1.68 (m, 2 H) 2.56 - 2.61 (m, 2 H) 6.35 (dd, *J*=13.87, 7.84 Hz, 2 H) 6.73 (dd, *J*=8.16, 2.01 Hz, 1 H) 6.89 - 6.95 (m, 4 H) 7.06 (d, *J*=9.16 Hz, 2 H) 7.64 (t, *J*=7.91 Hz, 1 H). ESI-MS (*m/z*): calc for C<sub>23</sub>H<sub>25</sub>NO<sub>4</sub> [M - H]<sup>-</sup> 378.2; found 378.1 [M - H]<sup>-</sup>. HRMS (*m/z*): calc for C<sub>23</sub>H<sub>25</sub>NO<sub>4</sub> [M + H]<sup>+</sup> 380.1856; found 380.1855 [M + H]<sup>+</sup>; calc for C<sub>23</sub>H<sub>25</sub>NO<sub>4</sub> [M - H]<sup>-</sup> 378.1711; found 378.1717 [M - H]<sup>-</sup>.

## References

1. G. K. Walkup, Z. You, P. L. Ross, E. K. Allen, F. Daryae, M. R. Hale, J. O'Donnell, D. E. Ehmann, V. J. Schuck, E. T. Buurman, A. L. Choy, L. Hajec, K. Murphy-Benenato, V. Marone, S. A. Patey, L. A. Grosser, M. Johnstone, S. G. Walker, P. J. Tonge and S. L. Fisher, *Nat Chem Biol*, 2015, **11**, 416-423.



COS-13-A005-73 in CDCl3  
File No : 20130527\_26

Sample Name:

Data Collected on:  
localhost.localdomain-vmrns400  
Archive directory:

Sample directory:

FidFile: PROTON

Pulse Sequence: PROTON (s2pul)  
Solvent: cdcl3  
Data collected on: May 27 2013

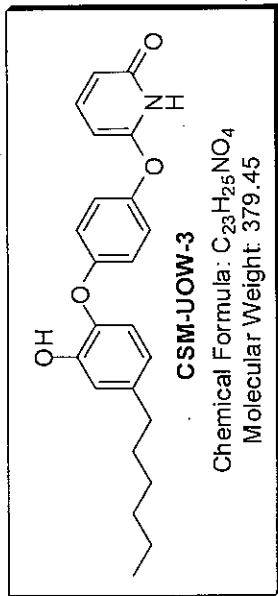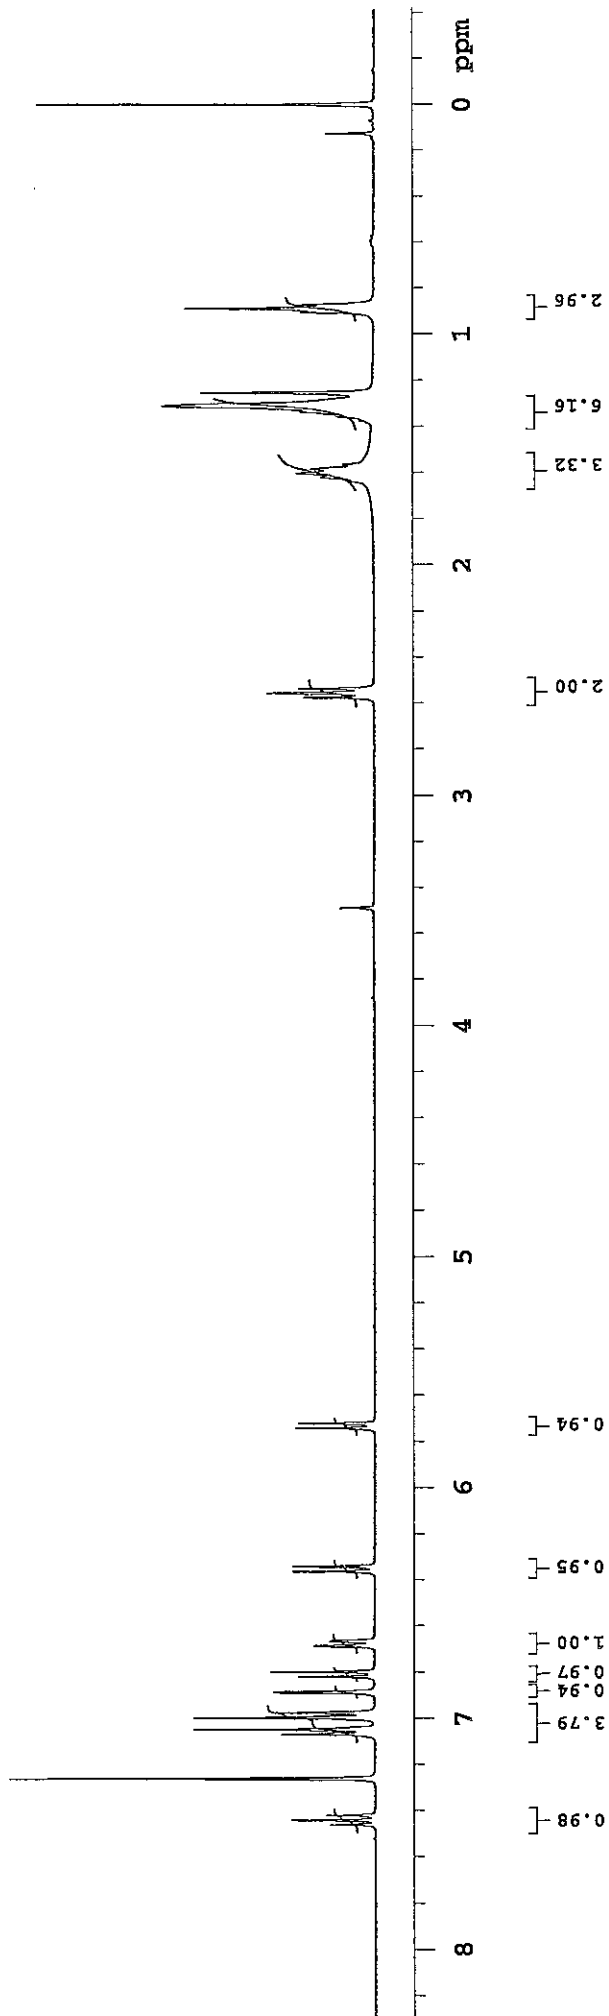

**Sample Name** COS-13-A005-73      **Position** Vial 1      **Instrument Name** Instrument 1      **User Name** Not Applicable  
**Inj Vol** 0.5      **InjPosition** ILS.m      **SampleType** Sample      **IRM Calibration Status** 5/22/2013 3:25:16 PM  
**Data Filename** 220513M042.d      **ACQ Method**      **Comment** **Acquired Time**

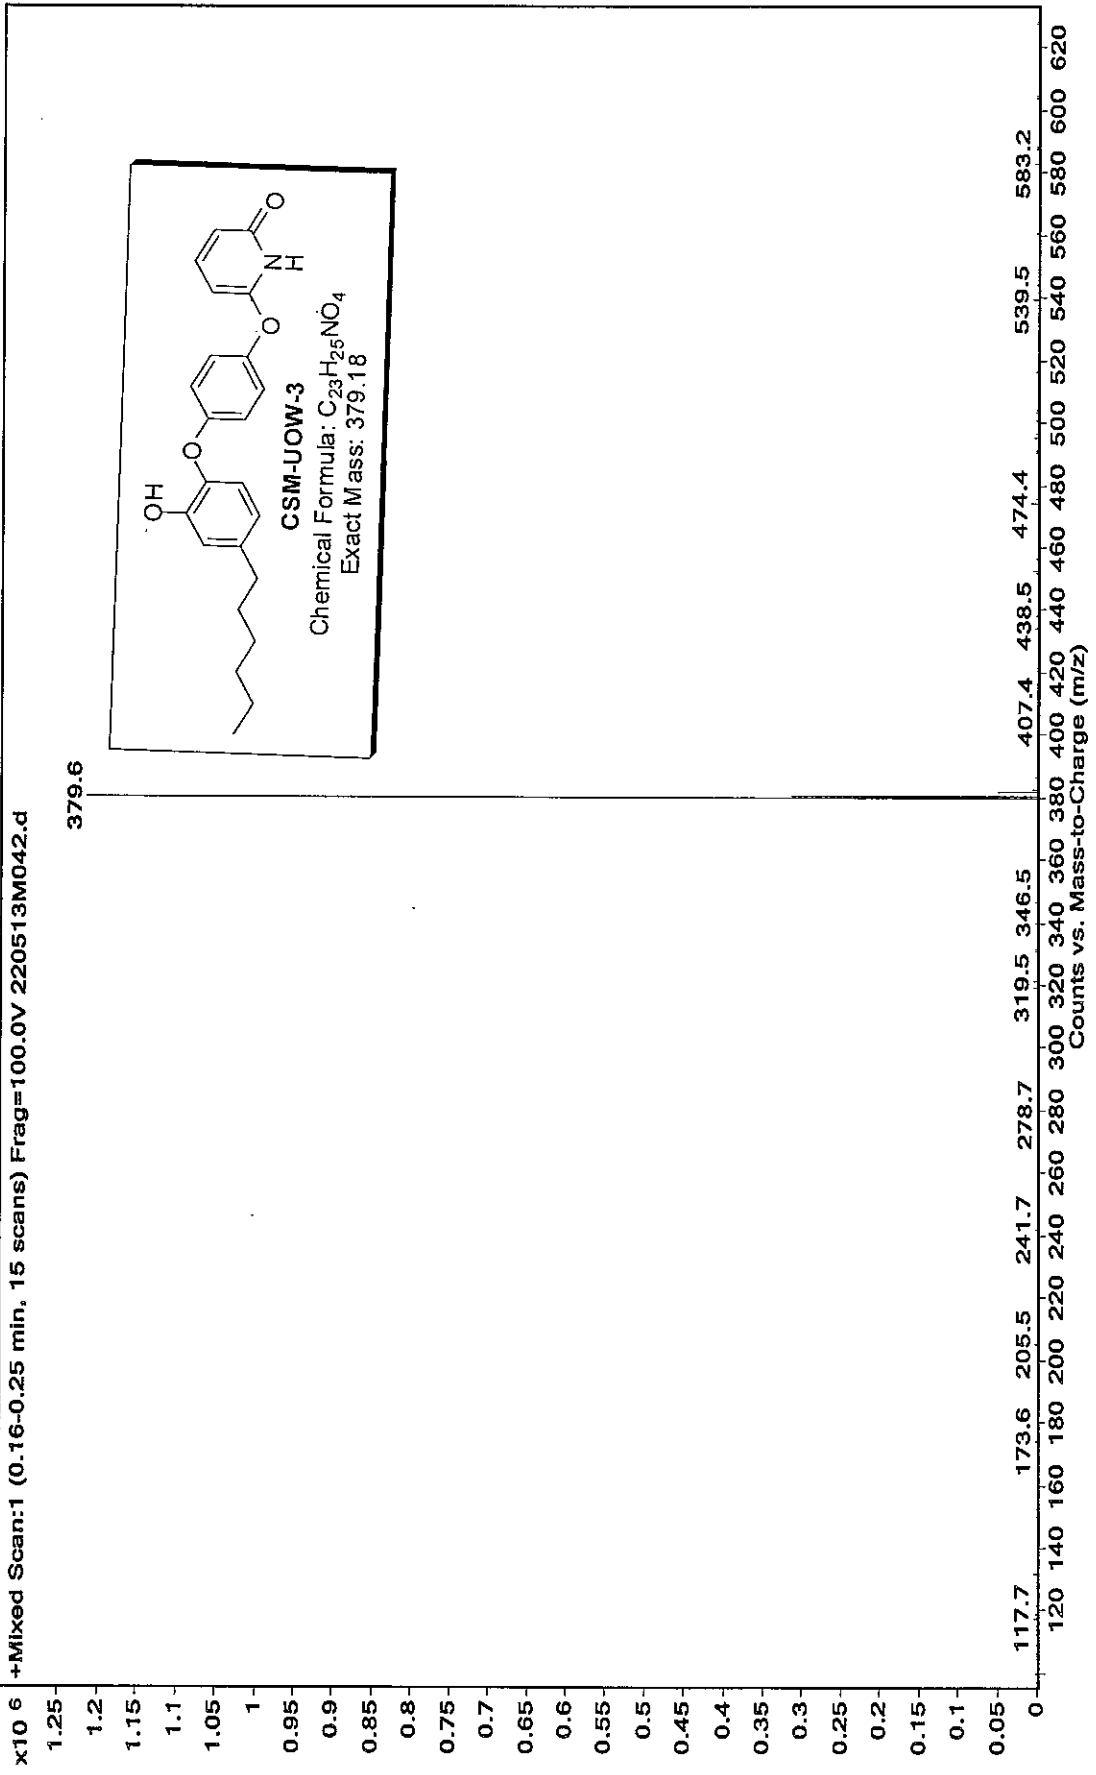

51-50-76  
*[Signature]*

# LC-MS Analysis Report

|                               |                |                      |                      |
|-------------------------------|----------------|----------------------|----------------------|
| <b>Data Filename</b>          | 220513LM042.d  | <b>Sample Name</b>   | COS-13-A005-73       |
| <b>Sample Type</b>            | Sample         | <b>Position</b>      | Vial 1               |
| <b>Instrument Name</b>        | Instrument 1   | <b>User Name</b>     |                      |
| <b>Acq Method</b>             | ILS LM-2.m     | <b>Acquired Time</b> | 5/22/2013 4:57:45 PM |
| <b>IRM Calibration Status</b> | Not Applicable | <b>DA Method</b>     | Default.m            |
| <b>Comment</b>                |                |                      |                      |

**Sample Group**      **Info.**                      XBridge C18 150\*4.6mm  
5µm

## User Chromatograms

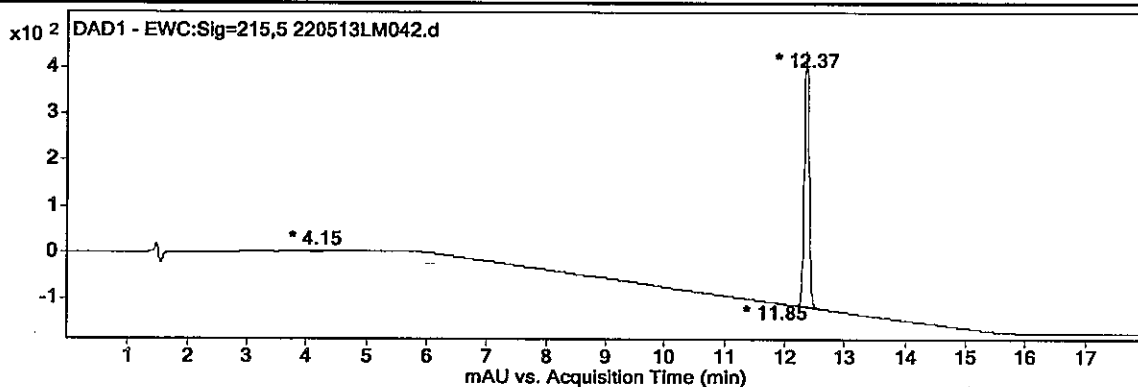

### Integration Peak List

| Peak | RT    | Area     | %Area |
|------|-------|----------|-------|
| 1    | 4.15  | 6.805    | 0.22  |
| 2    | 11.85 | 1.721    | 0.06  |
| 3    | 12.37 | 3019.536 | 99.72 |

## User Spectra

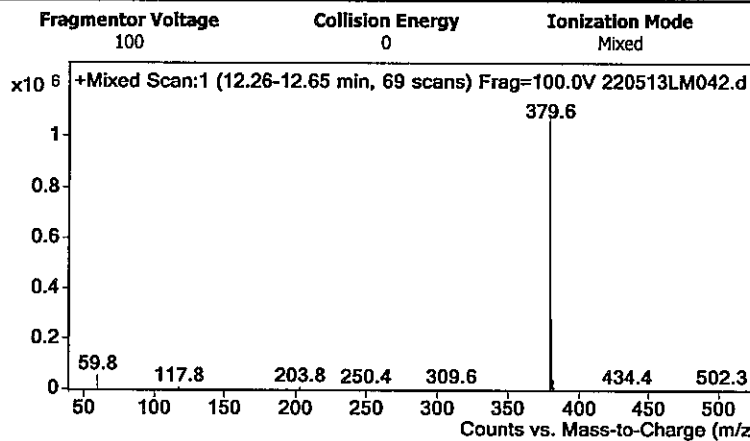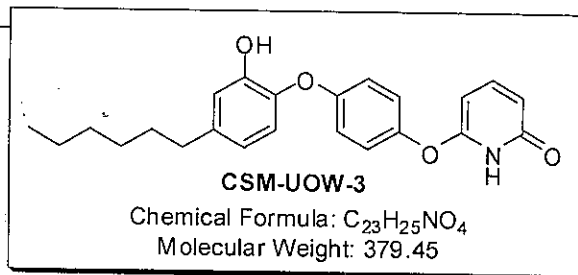

--- End Of Report ---

*[Handwritten Signature]*  
22-05-13

COSMIC DISCOVERIES @ ILS  
HPLC ANALYSIS REPORT

Injection Date : Wed, 22. May. 2013  
 Sample Name : COS-13-A005-73  
 Acq Operator : RADHA  
 Acq. Method : D:\chem32\1\DATA\220513-API COS 2013-05-22 18-24-38\-->  
 Analysis Method : D:\CHEM32\_002\1\METHODS\AMD COS.M  
 Method Info : Column: X-BRIDGE C-18 150\*4.6mm 5µm  
 Mobile phase: A) 0.1% TFA in Water B) ACN  
 T/%B: 0/40, 3/40, 13/95, 20/95, 22/40, 25/40  
 Flow: 1.0ml/min, Diluent: MEOH

Seq Line : 7  
 Location : Vial 53  
 Inj. No. : 1  
 Inj. Vol. : 10 µl

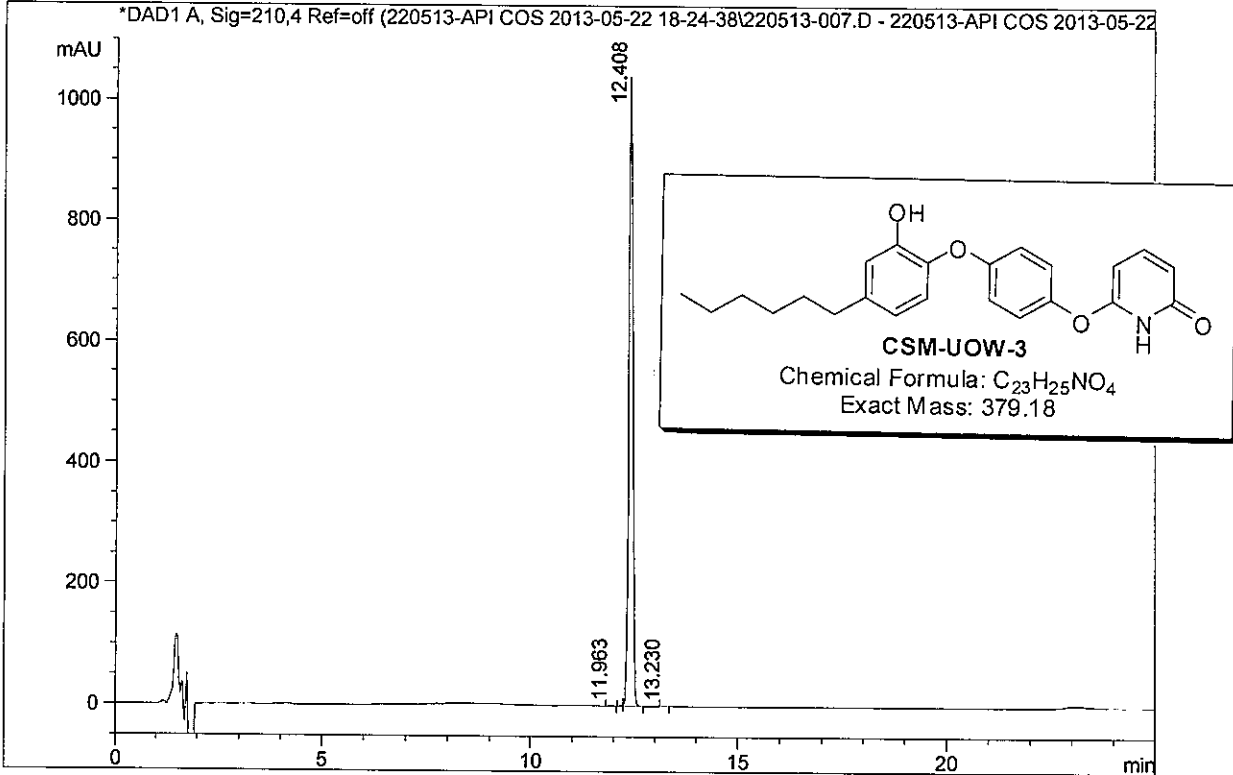

Signal 1: DAD1 A, Sig=210,4 Ref=off

| Peak # | RT [min] | Area     | Area % |
|--------|----------|----------|--------|
| 1      | 11.963   | 7.412    | 0.101  |
| 2      | 12.168   | 8.706    | 0.119  |
| 3      | 12.408   | 7306.644 | 99.734 |
| 4      | 13.230   | 3.403    | 0.046  |

*Radha  
23/05/13*

\*\*\* End of Report \*\*\*
